# Supplementary material
Source: publisher figshare collection journal article supplement (https://gsajournals.figshare.com/ndownloader/files/12776399)
Supplement: Supplementary file 1 [file 12776399]

Table S9. Output data for the MAGIC population
Chr	cM	LOD
1	1	0.305135141
1	2	0.359978282
1	3	0.498606648
1	4	0.447458657
1	5	0.422076556
1	6	0.271023003
1	7	0.297912705
1	8	0.620824187
1	9	0.790752843
1	10	0.772834218
1	11	0.607655773
1	12	0.488867475
1	13	0.466669984
1	14	0.414626447
1	15	0.384272196
1	16	0.396997398
1	17	0.273418171
1	18	0.242414764
1	19	0.196785849
1	20	0.191910513
1	21	0.222744094
1	22	0.645646178
1	23	0.434011896
1	24	0.40323635
1	25	0.431934005
1	26	0.466449071
1	27	0.568049447
1	28	0.629270433
1	29	0.775510072
1	30	0.800597469
1	31	0.784396866
1	32	0.752348659
1	33	0.610305604
1	34	0.54135331
1	35	0.419552875
1	36	0.396017092
1	37	0.382805644
1	38	0.388804328
1	39	0.374593565
1	40	0.430196279
1	41	0.53397936
1	42	0.22008672
1	43	0.182947642
1	44	0.170510573
1	45	0.17297912
1	46	0.16494601
1	47	0.16313397
1	48	0.197447439
1	49	0.136059973
1	50	0.152191265
1	51	0.230909876
1	52	0.193389362
1	53	0.176018909
1	54	0.259583346
1	55	0.19908476
1	56	0.191117413
1	57	0.212991047
1	58	0.178071873
1	59	0.131725537
1	60	0.045386344
1	61	0.046571899
1	62	0.091191647
1	63	0.059088766
1	64	0.032940181
1	65	0.03928022
1	66	0.036769458
1	67	0.019972842
1	68	0.006194818
1	69	0.001701984
1	70	0.000651897
1	71	0.000518925
1	72	0.005001795
1	73	0.020762116
1	74	0.024024992
1	75	0.061161667
1	76	0.073454747
1	77	0.079979898
1	78	0.140635427
1	79	0.096610742
1	80	0.185532981
1	81	0.372418686
1	82	0.325058613
1	83	0.311122385
1	84	0.554934449
1	85	0.591373439
1	86	0.553936851
2	1	0.039419964
2	2	0.078237649
2	3	0.100955351
2	4	0.051056169
2	5	0.043276852
2	6	0.016401838
2	7	0.114398815
2	8	0.177162862
2	9	0.127676623
2	10	0.077218278
2	11	0.090852026
2	12	0.40611363
2	13	0.30031879
2	14	0.173919645
2	15	0.150975809
2	16	0.187862811
2	17	0.313057653
2	18	0.236894686
2	19	0.360637488
2	20	0.123389005
2	21	0.08055963
2	22	0.071047986
2	23	0.090860778
2	24	0.181885034
2	25	0.243895244
2	26	0.272564012
2	27	0.172912806
2	28	0.253033517
2	29	0.219534126
2	30	0.215751375
2	31	0.200391238
2	32	0.216768457
2	33	0.186434149
2	34	0.147788965
2	35	0.124996864
2	36	0.108493183
2	37	0.090380622
2	38	0.016259854
2	39	0.006493859
2	40	0.006038255
2	41	0.002301429
2	42	0.015759275
2	43	0.025862989
2	44	0.019187117
2	45	0.019066908
2	46	0.024067184
2	47	0.03909588
2	48	0.031045477
2	49	0.010419019
2	50	0.058236479
2	51	0.069108593
2	52	0.080523386
2	53	0.091255217
2	54	0.074839613
2	55	0.066512778
2	56	0.172466041
2	57	0.120684891
2	58	0.118609775
2	59	0.108533123
2	60	0.125000034
2	61	0.124392671
2	62	0.12250421
2	63	0.101454802
2	64	0.285774689
2	65	0.534187659
2	66	0.659177602
2	67	0.462438318
2	68	0.644289489
2	69	0.573918808
2	70	0.457958972
2	71	0.601822577
2	72	0.926951227
3	1	0.216803587
3	2	0.215797703
3	3	0.175805551
3	4	0.186148634
3	5	0.339325093
3	6	0.484847643
3	7	0.294079753
3	8	0.383252683
3	9	0.468358837
3	10	0.432937619
3	11	0.349325886
3	12	0.349724705
3	13	0.247163722
3	14	0.276939767
3	15	0.369298507
3	16	0.449278549
3	17	0.415309706
3	18	0.469444935
3	19	0.609197513
3	20	0.706521514
3	21	0.710570596
3	22	0.655190503
3	23	0.567125662
3	24	0.618035103
3	25	0.605514967
3	26	0.892455327
3	27	0.635541222
3	28	0.57659109
3	29	0.581317524
3	30	0.51043344
3	31	0.763582663
3	32	1.41849208
3	33	1.272409278
3	34	1.486514233
3	35	1.79866731
3	36	0.741594491
3	37	0.415947668
3	38	0.481116516
3	39	0.50042553
3	40	0.443957293
3	41	0.372936974
3	42	0.155858009
3	43	0.069540748
3	44	0.093289034
3	45	0.083418856
3	46	0.055920779
3	47	0.055051647
3	48	0.053605753
3	49	0.016307624
3	50	0.087564225
3	51	0.05114246
3	52	0.068511348
3	53	0.086039772
3	54	0.109744263
3	55	0.139655728
3	56	0.161364114
3	57	0.126203107
3	58	0.095940351
3	59	0.172885824
3	60	0.151158028
3	61	0.133293899
3	62	0.132836426
3	63	0.480768811
3	64	0.435582071
3	65	0.327964819
3	66	0.240506782
3	67	0.285271456
3	68	0.27863596
3	69	0.224825633
3	70	0.263890916
3	71	0.233685986
3	72	0.192171276
3	73	0.190975394
3	74	0.30821055
3	75	0.321733658
3	76	0.471029182
3	77	0.30018394
3	78	0.267563292
3	79	0.264860469
3	80	0.24825062
3	81	0.2086802
3	82	0.211447565
3	83	0.237073163
3	84	0.255405655
3	85	0.263198361
3	86	0.307566057
3	87	0.302726533
3	88	0.289991259
3	89	0.247379285
3	90	0.186559472
3	91	0.133435083
3	92	0.097749689
3	93	0.082564261
3	94	0.028122003
3	95	0.017313209
3	96	0.004911439
3	97	0.00414939
3	98	0.002582262
3	99	0.00238045
3	100	0.008321297
3	101	0.00583688
3	102	0.007727896
3	103	0.01112443
3	104	0.01675812
3	105	0.014038382
3	106	0.00888215
3	107	0.005777219
3	108	0.018312269
3	109	0.018691709
3	110	0.004876046
3	111	0.005982692
3	112	0.030659511
3	113	0.032319228
3	114	0.022334207
3	115	0.012572932
3	116	0.006610402
3	117	0.029410679
3	118	0.038928006
3	119	0.104866247
3	120	0.049117198
3	121	0.016989496
3	122	0.027138518
3	123	0.019897154
3	124	0.017289986
3	125	0.022818959
3	126	0.010819752
3	127	0.007300906
3	128	0.007010242
3	129	0.016144002
3	130	0.018767513
3	131	0.02639831
3	132	0.094717205
4	1	0.771024414
4	2	0.934750603
4	3	0.902301062
4	4	0.814243764
4	5	0.781800747
4	6	0.770312849
4	7	0.611732861
4	8	0.598185503
4	9	0.456622785
4	10	0.282407602
4	11	0.263105432
4	12	0.231487396
4	13	0.163050287
4	14	0.125780594
4	15	0.147291991
4	16	0.16724276
4	17	0.152275612
4	18	0.093605941
4	19	0.11007232
4	20	0.113096511
4	21	0.103608246
4	22	0.103255344
4	23	0.332623043
4	24	0.614524703
4	25	0.646618193
4	26	0.44864673
4	27	0.440715696
4	28	0.43004513
4	29	0.507421128
4	30	0.328997584
4	31	0.019747348
4	32	0.013411178
4	33	0.008980224
4	34	0.005374565
4	35	0.005591363
4	36	0.015449037
4	37	0.018979972
4	38	0.006356871
4	39	0.005242178
4	40	0.002769052
4	41	0.004380443
4	42	0.082161264
4	43	0.164664631
4	44	0.149707782
4	45	0.140244819
4	46	0.14076707
4	47	0.110091519
4	48	0.025880061
4	49	0.015127536
4	50	0.019296911
4	51	0.02524732
4	52	0.032035086
4	53	0.038783654
4	54	0.041295758
4	55	0.064708537
4	56	0.085198632
4	57	0.075863189
4	58	0.063798297
4	59	0.074443307
4	60	0.106694443
4	61	0.133449681
4	62	0.164632034
4	63	0.15565917
4	64	0.1580493
4	65	0.167347887
4	66	0.215652198
4	67	0.384525513
4	68	0.601186783
4	69	0.481030824
4	70	0.397130457
4	71	0.239061248
4	72	0.116174378
4	73	0.209383069
4	74	0.219287643
4	75	0.176363543
4	76	0.146133649
4	77	0.126261402
4	78	0.110248442
5	1	36.63241266
5	2	39.65531592
5	3	39.72716505
5	4	46.93771851
5	5	47.64081663
5	6	45.33087131
5	7	47.41598286
5	8	55.91811839
5	9	99.75010075
5	10	116.5138339
5	11	156.276712
5	12	154.4566598
5	13	105.3288229
5	14	80.0848862
5	15	66.21996911
5	16	55.07380543
5	17	53.58217499
5	18	50.76963757
5	19	40.90066247
5	20	30.9140545
5	21	25.33378123
5	22	20.84382511
5	23	18.21395501
5	24	15.95458977
5	25	15.10949173
5	26	17.0897025
5	27	16.856064
5	28	15.25561977
5	29	12.61513833
5	30	9.301246216
5	31	6.855783693
5	32	6.261168043
5	33	3.729906868
5	34	3.490368261
5	35	2.470872334
5	36	2.358244868
5	37	2.030001041
5	38	1.37022357
5	39	1.147354122
5	40	1.128205962
5	41	1.037191251
5	42	0.757086295
5	43	0.544945644
5	44	0.55880589
5	45	0.683238585
5	46	1.200655004
5	47	1.511325031
5	48	1.652003625
5	49	1.344487682
5	50	1.42951629
5	51	1.360980271
5	52	1.269626235
5	53	1.051246518
5	54	1.020201416
5	55	0.792513365
5	56	0.717689455
5	57	0.664646347
5	58	0.602875025
5	59	0.962071896
5	60	1.195544612
5	61	1.115364376
5	62	0.867388787
5	63	0.648168478
5	64	0.766372123
5	65	0.767457467
5	66	0.724794569
5	67	0.69213514
5	68	0.463300105
5	69	0.320915339
5	70	0.344120648
5	71	0.354452209
5	72	0.362497302
5	73	0.358457904
5	74	0.350910362
5	75	0.322336414
5	76	0.264827894
5	77	0.196798675
5	78	0.170060825
5	79	0.197355265
5	80	0.304107754
5	81	0.291849281
5	82	0.321172488
5	83	0.322835012
5	84	0.327240831
5	85	0.20336304
5	86	0.188495876
5	87	0.181161511
5	88	0.14730211
5	89	0.143771304
5	90	0.162386458
5	91	0.161535839
5	92	0.156342017
5	93	0.149673864
5	94	0.078690416
5	95	0.070665176
5	96	0.055818251
5	97	0.033178013
5	98	0.038788601
5	99	0.043516477
5	100	0.079829658
5	101	0.090555101
5	102	0.110752413
5	103	0.111115806
5	104	0.09126587
5	105	0.108507451
5	106	0.143423157
6	1	0.461952794
6	2	0.352731091
6	3	0.487088249
6	4	0.527508776
6	5	0.575727101
6	6	0.58685772
6	7	0.629238264
6	8	0.820412826
6	9	0.552765535
6	10	0.503971608
6	11	0.734317725
6	12	0.718337847
6	13	0.713111993
6	14	0.919873507
6	15	0.76396254
6	16	0.65583127
6	17	0.700614355
6	18	0.74042126
6	19	1.045070241
6	20	1.004002509
6	21	0.845142624
6	22	0.716488262
6	23	0.543324287
6	24	0.475841672
6	25	0.673526233
6	26	0.826105792
6	27	0.821296505
6	28	0.832983504
6	29	0.667084906
6	30	0.652166223
6	31	0.624774859
6	32	0.667280691
6	33	0.617024977
6	34	0.36948868
6	35	0.353799613
6	36	0.246001826
6	37	0.360535819
6	38	0.659807719
6	39	0.588844646
6	40	0.487172264
6	41	0.479738364
6	42	0.586203529
6	43	0.816156065
6	44	0.693809627
6	45	0.82183013
6	46	0.963018167
6	47	1.177685657
6	48	1.219179708
6	49	1.182445938
6	50	1.354615225
6	51	1.305186573
6	52	1.238773412
6	53	1.159138589
6	54	1.070927273
6	55	0.602701714
6	56	0.561860382
6	57	0.787300011
6	58	0.768806006
6	59	0.761586061
6	60	0.780873583
6	61	0.79626956
6	62	0.804735438
6	63	0.792011805
6	64	0.700845487
6	65	0.57952319
6	66	0.514325974
6	67	0.386182534
6	68	0.407175951
6	69	0.429170369
6	70	0.452173403
6	71	0.476155631
6	72	0.50103847
6	73	0.526686949
6	74	0.573650505
6	75	0.521278404
6	76	0.459345713
6	77	0.334786052
6	78	0.237033573
6	79	0.182805728
6	80	0.171142943
7	1	0.666533306
7	2	0.575591632
7	3	0.574478433
7	4	0.680220419
7	5	0.643053829
7	6	1.244126626
7	7	1.278179802
7	8	1.466594362
7	9	1.614655206
7	10	1.716192706
7	11	1.53303743
7	12	1.911364744
7	13	1.846587512
7	14	1.497790387
7	15	0.898313371
7	16	0.973106412
7	17	0.92911575
7	18	0.755468163
7	19	0.883495293
7	20	1.00686777
7	21	1.12165136
7	22	1.37915747
7	23	1.084734835
7	24	0.62938637
7	25	0.555650928
7	26	0.503511537
7	27	0.56629442
7	28	0.610194809
7	29	0.553214268
7	30	0.494153548
7	31	0.561188882
7	32	0.683213297
7	33	0.650050858
7	34	0.666387074
7	35	0.63986101
7	36	0.486678918
7	37	0.410169734
7	38	0.560099561
7	39	0.296535371
7	40	0.207556146
7	41	0.341745601
7	42	0.970143594
7	43	1.12298008
7	44	1.061549034
7	45	0.867937402
7	46	0.945670141
7	47	0.860559772
7	48	0.804398563
7	49	0.586520448
7	50	0.305324991
7	51	0.23461143
7	52	0.422694704
7	53	0.345858519
7	54	0.419834555
7	55	0.411599644
7	56	0.459151371
7	57	0.423855466
7	58	0.524106843
7	59	0.490281415
7	60	0.447672502
7	61	0.223324285
7	62	0.197928821
7	63	0.326347713
7	64	0.252110384
7	65	0.249610697
7	66	0.297038194
7	67	0.240629449
7	68	0.133051054
7	69	0.154543567
7	70	0.135087532
7	71	0.161692374
7	72	0.170510316
7	73	0.140545988
7	74	0.108446255
7	75	0.119512139
7	76	0.285990869
7	77	0.306858183
7	78	0.2836689
7	79	0.25271929
7	80	0.461384707
7	81	0.520213405
7	82	0.834959506
7	83	0.785047725
7	84	0.665469517
7	85	0.677829008
7	86	0.532263549
7	87	0.490763295
7	88	0.480584574
7	89	0.563302322
7	90	0.394655225
7	91	0.401226907
7	92	0.292664956
7	93	0.289864097
7	94	0.281556568
7	95	0.325624742
7	96	0.335796474
7	97	0.058981023
7	98	0.060859468
7	99	0.061939198
7	100	0.061026357
7	101	0.040571779
7	102	0.06487899
7	103	0.068702432
7	104	0.072516708
8	1	0.971527028
8	2	0.835505424
8	3	0.647263245
8	4	0.494543878
8	5	0.422724376
8	6	0.408210547
8	7	0.44012494
8	8	0.42239106
8	9	0.331480329
8	10	0.361948468
8	11	0.364440454
8	12	0.522439658
8	13	0.737256169
8	14	0.959578995
8	15	0.943402235
8	16	0.980410627
8	17	0.91580171
8	18	0.912567598
8	19	0.921372367
8	20	0.894319949
8	21	1.297715271
8	22	1.167862251
8	23	1.162780443
8	24	1.147885371
8	25	1.277260568
8	26	1.071241319
8	27	1.045856196
8	28	0.792248001
8	29	0.874576514
8	30	0.990341755
8	31	0.234391596
8	32	0.209731323
8	33	0.211366115
8	34	0.175395626
8	35	0.110650994
8	36	0.061023075
8	37	0.05348687
8	38	0.081647368
8	39	0.115386163
8	40	0.101649333
8	41	0.068802132
8	42	0.079940433
8	43	0.072940917
8	44	0.047598125
8	45	0.04844381
8	46	0.049662173
8	47	0.146188419
8	48	0.123501436
8	49	0.157559217
8	50	0.190268501
8	51	0.15825767
8	52	0.195045238
8	53	0.104661179
8	54	0.090572704
8	55	0.079125573
8	56	0.052325058
8	57	0.070350941
8	58	0.125927959
8	59	0.215554335
8	60	0.653167095
8	61	0.570535583
8	62	0.547564992
8	63	0.592033478
8	64	0.40008175
8	65	0.403017619
8	66	0.352503555
8	67	0.187576284
8	68	0.215678595
8	69	0.248872763
8	70	0.25598711
8	71	0.266854982
8	72	0.235737088
8	73	0.224355368
8	74	0.291915784
8	75	0.258018881
8	76	0.217402851
8	77	0.282428463
8	78	0.266416411
9	1	0.017933803
9	2	0.020113447
9	3	0.021727992
9	4	0.035271675
9	5	0.025560606
9	6	0.06472645
9	7	0.069950645
9	8	0.08183498
9	9	0.143821427
9	10	0.15394952
9	11	0.145137471
9	12	0.179661682
9	13	0.300474592
9	14	0.163159181
9	15	0.063667416
9	16	0.025912589
9	17	0.01848792
9	18	0.024646274
9	19	0.020849985
9	20	0.02532456
9	21	0.043156268
9	22	0.06514523
9	23	0.138704921
9	24	0.14714975
9	25	0.31274224
9	26	0.287210171
9	27	0.284748775
9	28	0.45410825
9	29	0.429113135
9	30	0.482645826
9	31	0.448302296
9	32	0.374426315
9	33	0.310087161
9	34	0.464374114
9	35	0.599924494
9	36	0.516912728
9	37	0.406387644
9	38	0.488059755
9	39	0.495778732
9	40	0.508511453
9	41	0.539476402
9	42	0.534308856
9	43	0.76927215
9	44	0.651926092
9	45	0.617286343
9	46	0.615723155
9	47	0.707400601
9	48	0.779771185
9	49	0.866048055
9	50	1.077310225
9	51	1.92837765
9	52	1.427862878
9	53	1.236616772
9	54	2.074228036
9	55	1.982195426
9	56	1.762311051
9	57	1.86207489
9	58	1.419998302
9	59	1.003027359
9	60	0.630953271
9	61	0.420222628
9	62	0.37074499
9	63	0.413835079
9	64	0.579342718
9	65	0.259151571
9	66	0.093843627
9	67	0.081780479
9	68	0.05190804
9	69	0.04193166
9	70	0.056231743
9	71	0.08518057
9	72	0.131858506
9	73	0.169786135
9	74	0.209595809
9	75	0.247396767
9	76	0.282630222
9	77	0.184087789
9	78	0.134906151
9	79	0.022655495
9	80	0.022174538
9	81	0.022532348
9	82	0.006555935
9	83	0.00404121
9	84	0.002601694
9	85	0.01220825
9	86	0.006912902
9	87	0.019268819
9	88	0.014762201
9	89	0.025919009
9	90	0.014715111
9	91	0.078272226
9	92	0.167118004
9	93	0.16945111
9	94	0.186765333
9	95	0.180551726
9	96	0.226498207
9	97	0.020537034
10	1	1.522160676
10	2	1.637066096
10	3	1.867254357
10	4	2.119007078
10	5	2.405074304
10	6	2.229372558
10	7	1.381957123
10	8	1.250186591
10	9	1.888366034
10	10	1.488403006
10	11	1.942549931
10	12	2.069891011
10	13	1.9670275
10	14	2.028880532
10	15	1.754225942
10	16	2.385459941
10	17	2.252781076
10	18	3.777314273
10	19	3.334883306
10	20	3.034199379
10	21	3.471808216
10	22	3.652242567
10	23	3.306621835
10	24	3.227416103
10	25	2.811134403
10	26	2.320117567
10	27	1.635161363
10	28	1.628812045
10	29	1.553211403
10	30	1.504290518
10	31	1.500587056
10	32	1.601292238
10	33	0.749627441
10	34	0.849928601
10	35	0.646379416
10	36	0.743025
10	37	0.40956453
10	38	0.350538102
10	39	0.403116259
10	40	0.45505922
10	41	0.421262906
10	42	0.561550963
10	43	0.671516369
10	44	0.748666277
10	45	0.664003167
10	46	0.542706382
10	47	0.393067374
10	48	0.525281022
10	49	0.777795077
10	50	0.950094154
10	51	1.40522815
10	52	1.575107772
10	53	1.873852904
10	54	1.945994918
10	55	2.026263919
10	56	2.137901321
10	57	2.191075851
10	58	2.580184279
10	59	1.67372762
10	60	1.512622201
10	61	1.558579626
10	62	1.358755354
10	63	1.098181325
10	64	0.960707844
10	65	0.819244393
10	66	0.853055379
10	67	1.179146787
10	68	1.184084003
10	69	1.106165448
10	70	1.124159504
11	1	0.040835995
11	2	0.040459074
11	3	0.049859833
11	4	0.095654595
11	5	0.105935724
11	6	0.142344145
11	7	0.118471676
11	8	0.129667165
11	9	0.141563444
11	10	0.121538278
11	11	0.109209833
11	12	0.119179899
11	13	0.111133428
11	14	0.174485997
11	15	0.434460593
11	16	0.472445415
11	17	0.534673343
11	18	0.699674373
11	19	0.535866221
11	20	0.546467489
11	21	0.287547172
11	22	0.316205711
11	23	0.373294245
11	24	0.451680778
11	25	0.449030339
11	26	0.332286504
11	27	0.34605673
11	28	0.331746044
11	29	0.302629478
11	30	0.270069073
11	31	0.237964723
11	32	0.3420707
11	33	0.433360808
11	34	0.436496926
11	35	0.410343758
11	36	0.562380427
11	37	0.414604835
11	38	0.497576422
11	39	0.551964803
11	40	0.593360922
11	41	0.723767877
11	42	0.882217845
11	43	1.180382266
11	44	1.200676551
11	45	0.947080238
11	46	0.750541461
11	47	0.63172108
11	48	0.746263878
11	49	0.728079095
11	50	0.915599127
11	51	1.419785342
11	52	1.677475315
11	53	1.772425542
11	54	1.498400254
11	55	1.455273439
11	56	1.429080348
11	57	1.449928036
11	58	1.524057474
11	59	1.460614118
11	60	1.144534203
11	61	0.968913405
11	62	0.505749194
11	63	0.510582324
11	64	0.471539199
11	65	0.440885879
11	66	0.393549131
11	67	0.345748598
11	68	0.323864953
11	69	0.264982562
11	70	0.218420467
